# Supplementary material for: High performance Pd nanocrystals supported on SnO2-decorated graphene for aromatic nitro compound reduction
Source: Royal Society of Chemistry journal article supplement (doi:10.1039/c3ta14506a), 2013-12-09
Supplement: c3ta14506a.pdf [file c3ta14506a.pdf]

## Supporting Information

# High performance Pd nanocrystals supported on SnO<sub>2</sub>-decorated graphene for aromatic nitro compound reduction

5

Hongyan Li,<sup>a,b</sup> Shiyu Gan,<sup>a,b</sup> Dongxue Han,<sup>\*a</sup> Weiguang Ma,<sup>a,b</sup> Bin Cai,<sup>a,b</sup> Wei Zhang,<sup>a,b</sup> Qixian Zhang,<sup>a</sup>  
and Li Niu<sup>a</sup>

<sup>a</sup> State Key Laboratory of Electroanalytical Chemistry, c/o Engineering Laboratory for Modern Analytical Techniques, Changchun Institute of Applied  
Chemistry, Chinese Academy of Sciences, Changchun, 130022, Jilin, China. Fax: +8643185262800; Tel: +8643185262425; E-mail:  
[dxhan@ciac.ac.cn](mailto:dxhan@ciac.ac.cn)

<sup>b</sup> University of Chinese Academy of Sciences, Beijing 100039, China

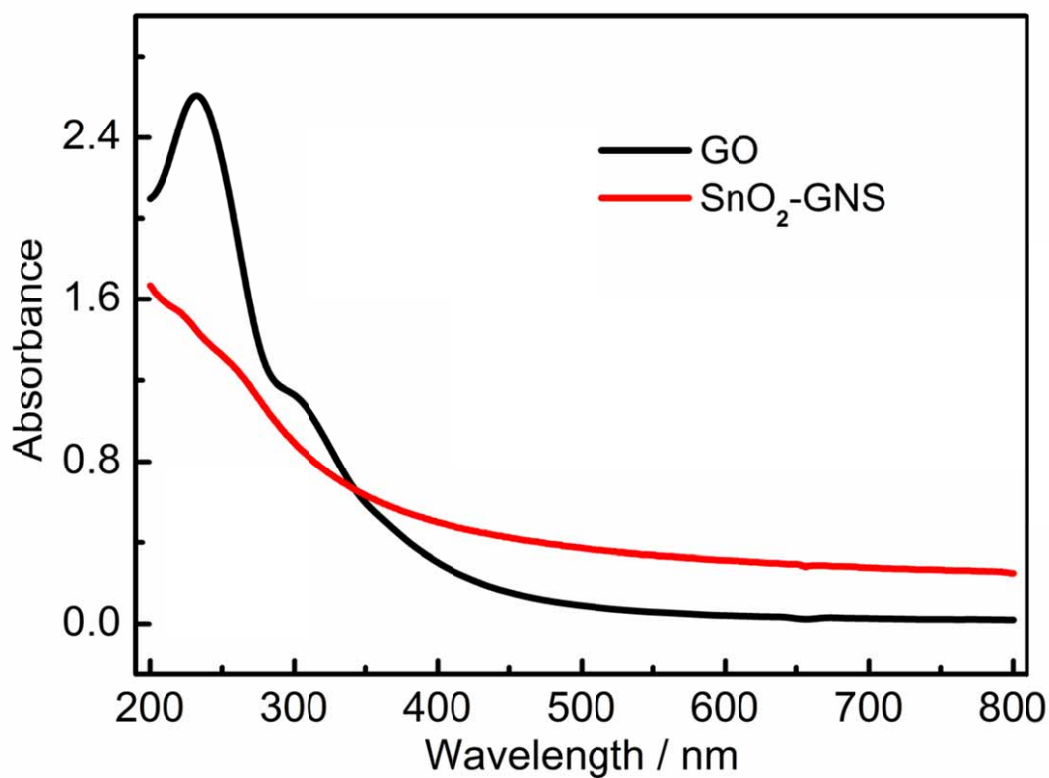

Fig. S1 The UV-vis absorption spectra of GO and the obtained SnO<sub>2</sub>-GNS

15

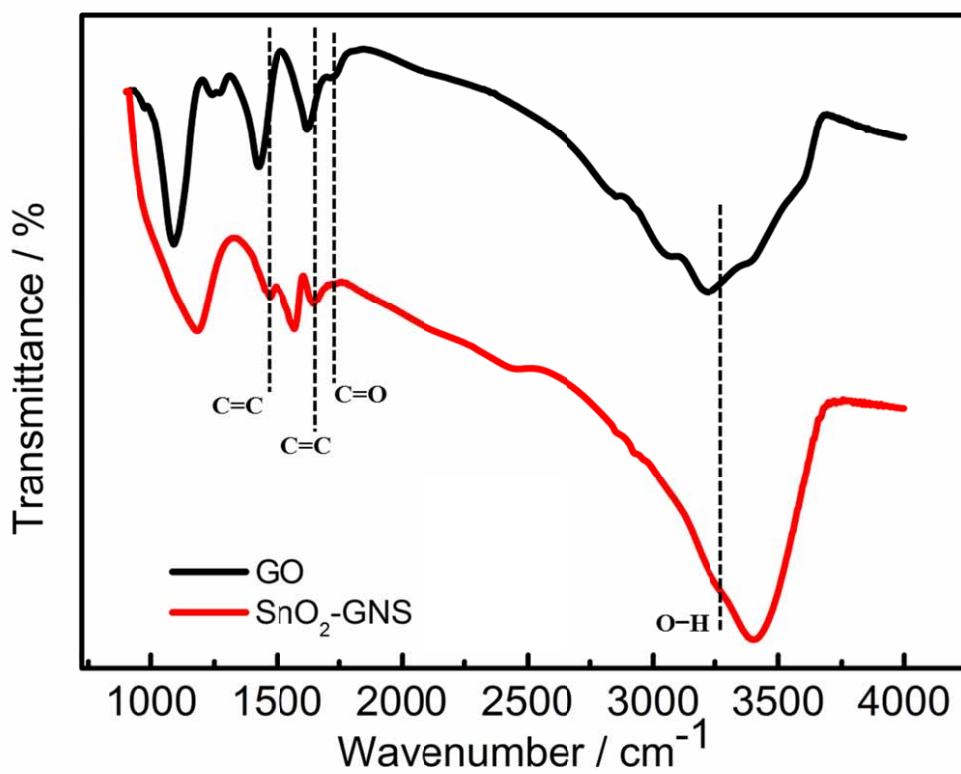

Fig. S2 The FTIR spectra of GO and the obtained SnO<sub>2</sub>-GNS.

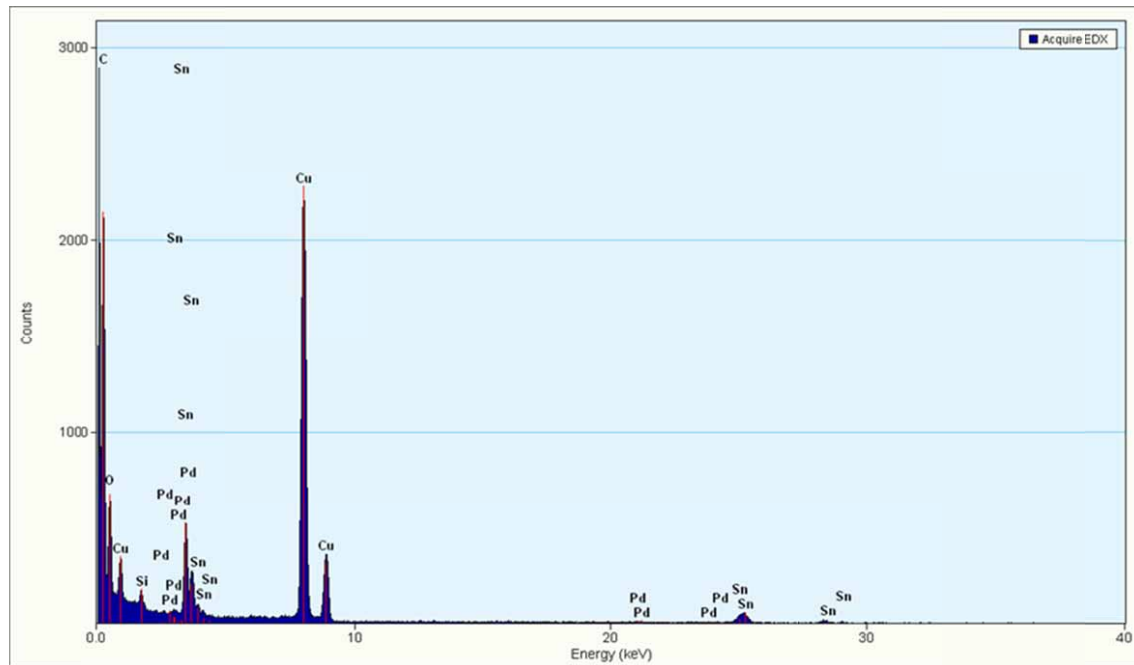

Fig. S3 Energy-dispersive X-ray image of PdNCs/SnO<sub>2</sub>-GNS nanohybrid

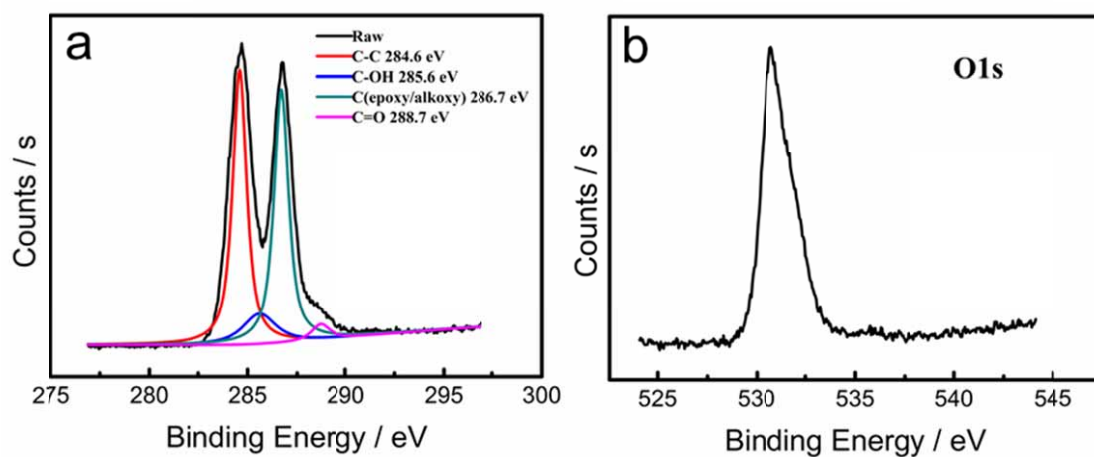

Fig.S4 (a) C 1s XPS spectra of GO. (b) O 1s XPS spectra of the PdNCs/SnO<sub>2</sub>-GNS.

5

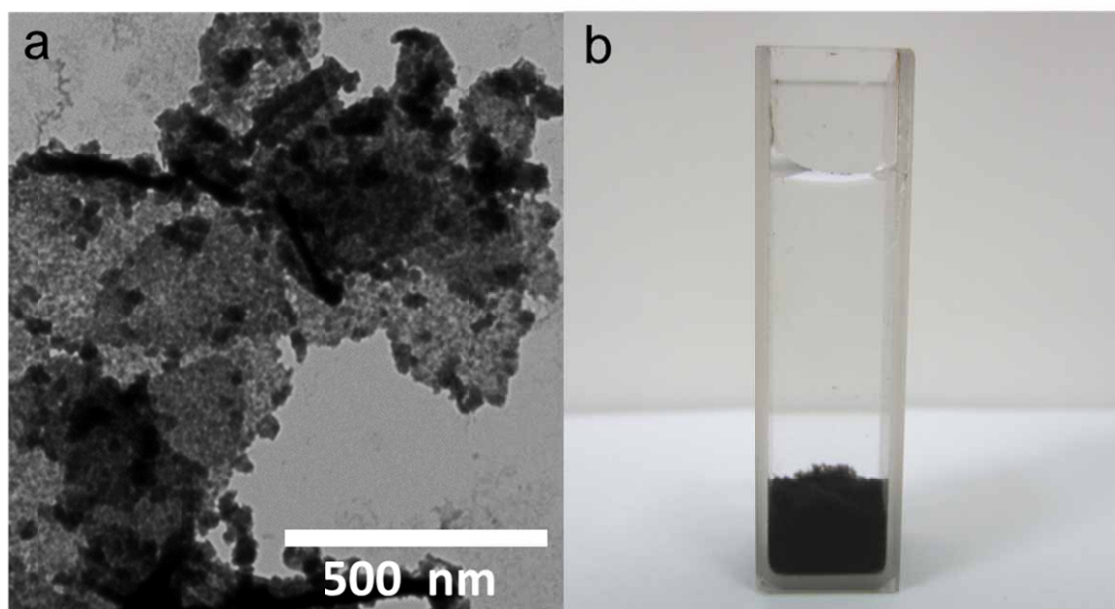

Fig. S5 (a) TEM image of SnO<sub>2</sub>-GNS nanocomposites without PDDA noncovalent functionalization. (b) The digital photo of as-made SnO<sub>2</sub>-GNS is obvious aggregation in the quartz cuvette.

10

15
